# Supplementary material
Source: publisher figshare collection journal article supplement (https://acs.figshare.com/ndownloader/files/4673473)
Supplement: Supplementary file 1 [file 4673473]

CdSe Nanorods Functionalized with Thiol-anchored Oligothiophenes

Bryan C. Sih and Michael O. Wolf*

Department of Chemistry, University of British Columbia, Vancouver, BC, Canada, V6T 1Z1

# Supporting Information

Figure S1. Cyclic voltammetry of (a) 3 and (b) 3-CdSe (5 cycles) from 0 to 1.3 V in CH2Cl2 containing 0.1 M (C4H9)NPF6. The arrows indicate the direction of current change with each successive scan.

Figure S2. Excitation () and emission () spectra of the capping groups (a) 2 and (b) 3 in CHCl3 excited at 326 and 363 nm, respectively.

Figure S3. Emission spectra of 3-CdSe as a function of time.


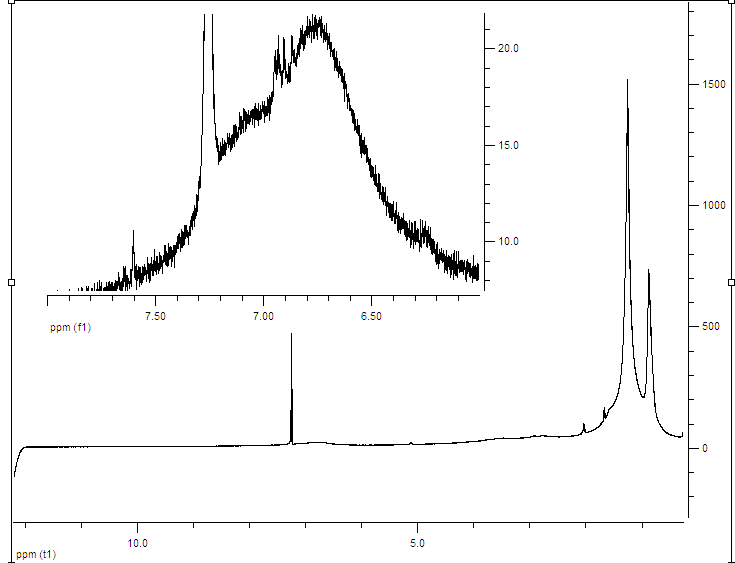


(a)


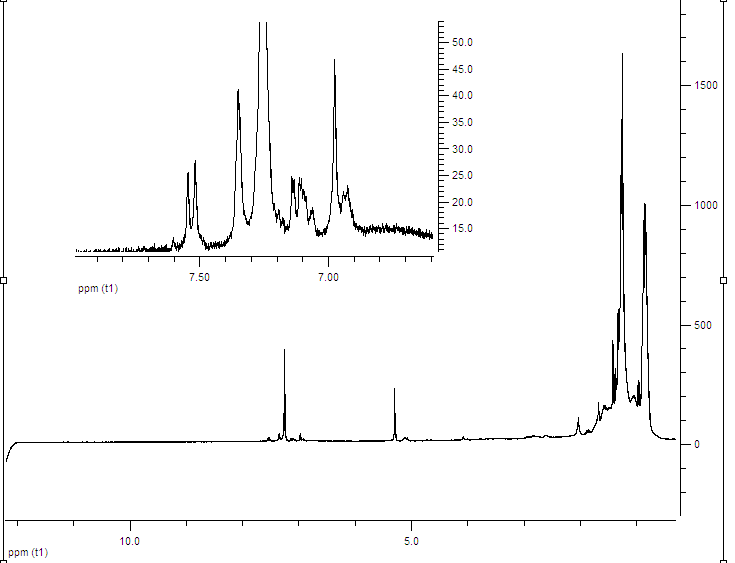


Residual CH2Cl2

(b)


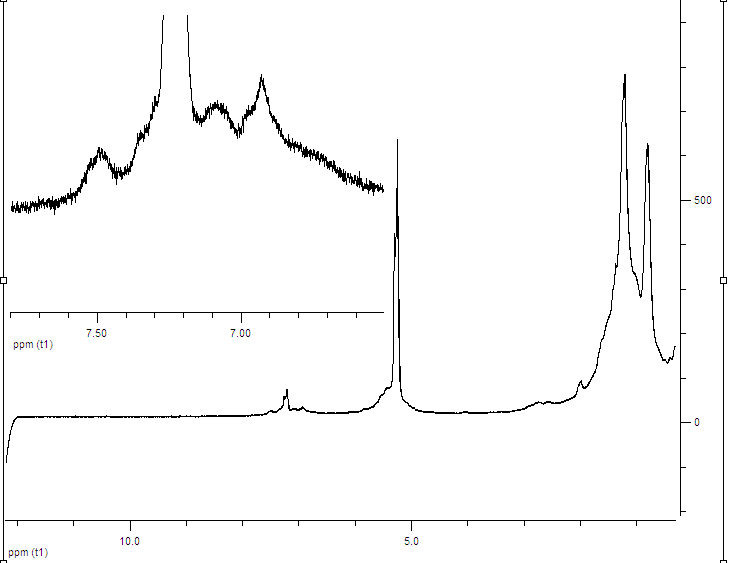


Residual CH2Cl2

(c)


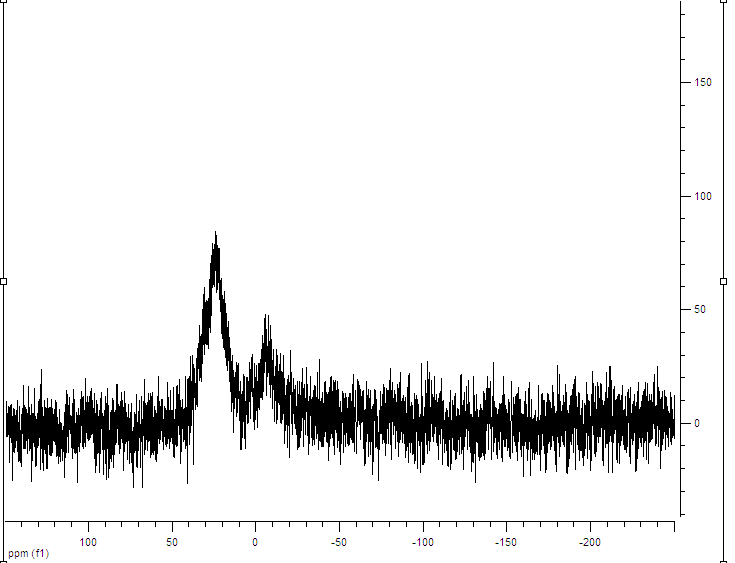


(d)

Figure S4. 1H NMR spectra of (a) 1-CdSe, (b) 2-CdSe and (c) 3-CdSe dissolved in CDCl3 (300 MHz). Insets: expansion of the oligothiophene region. The () indicates the proton signal of residual CHCl3 present in the solvent. 31P NMR spectra of (d) 1-CdSe, (e) 2-CdSe and (f) 3-CdSe dissolved in CDCl3 (300 MHz).


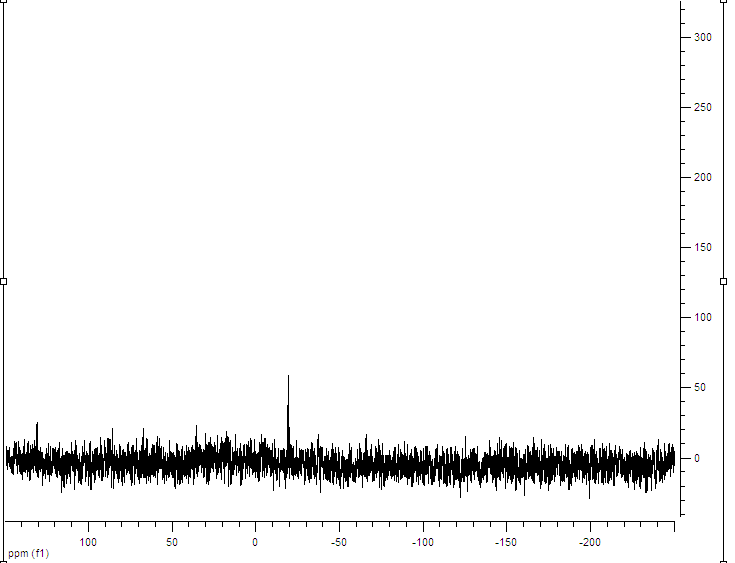


(e)


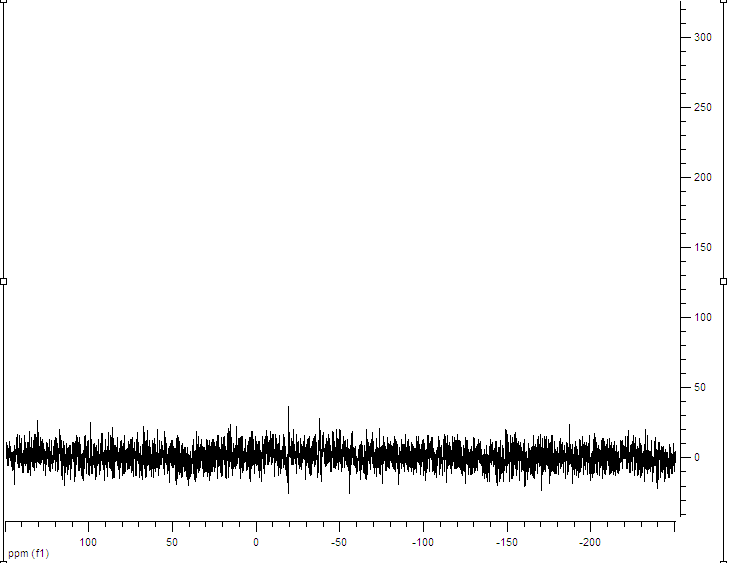


(f)

Figure S5. Solid-state emission spectra of (a) 2-CdSe and (b) 3-CdSe.
